# Supplementary material
Source: publisher figshare collection journal article supplement (https://frontiersin.figshare.com/ndownloader/files/33358940)
Supplement: Supplementary file [file 33358940]

## 1. Supplementary Tables

### 1.1. **Supplementary Table 1.** Descriptive information on individual items from the *Adult Reading History Questionnaire* (Lefly & Pennington, 2000).

| Item                                       | Description                                                                                                                                  | <i>m</i> | <i>sd</i> | Item-<br>Total<br><i>r</i> | Item-<br>Rest<br><i>r</i> | $\alpha$ |
|--------------------------------------------|----------------------------------------------------------------------------------------------------------------------------------------------|----------|-----------|----------------------------|---------------------------|----------|
| <b>Adult Reading History Questionnaire</b> |                                                                                                                                              |          |           |                            |                           |          |
| 1                                          | Which of the following most nearly describes your attitude toward school when you were a child?                                              | 1.023    | 0.929     | 0.455                      | 0.431                     | 0.870    |
| 2                                          | How much difficulty did you have learning to read in elementary school?                                                                      | 0.693    | 1.129     | 0.727                      | 0.651                     | 0.862    |
| 3                                          | How much extra help did you need when learning to read in elementary school?                                                                 | 0.695    | 1.134     | 0.668                      | 0.591                     | 0.864    |
| 4                                          | Did you ever reverse the order of letters or numbers when you were a child?                                                                  | 0.436    | 0.897     | 0.451                      | 0.373                     | 0.871    |
| 5                                          | Did you have difficulty learning letter and/or color names when you were a child?                                                            | 0.173    | 0.521     | 0.550                      | 0.494                     | 0.870    |
| 6                                          | How would you compare your reading skill to that of others in your elementary classes?                                                       | 1.087    | 1.141     | 0.701                      | 0.641                     | 0.863    |
| 7                                          | All students struggle from time to time in school. In comparison to others in your classes, how much did you struggle to complete your work? | 1.148    | 1.029     | 0.689                      | 0.637                     | 0.863    |
| 8                                          | Did you experience difficulty in high school or college English classes?                                                                     | 0.791    | 0.972     | 0.660                      | 0.602                     | 0.865    |
| 9                                          | What is your current attitude toward reading?                                                                                                | 0.349    | 0.637     | 0.507                      | 0.472                     | 0.870    |
| 10                                         | How much reading do you do for pleasure?                                                                                                     | 1.319    | 1.069     | 0.444                      | 0.388                     | 0.871    |
| 11                                         | How would you compare your current reading speed to that of others of the same age and education?                                            | 1.411    | 0.948     | 0.579                      | 0.548                     | 0.866    |
| 12                                         | How much reading do you do in conjunction with your work? (If retired or not working, how much did you read when you were working?)          | 1.087    | 1.029     | 0.401                      | 0.381                     | 0.871    |
| 13                                         | How much difficulty did you have learning to spell in elementary school?                                                                     | 0.982    | 1.167     | 0.655                      | 0.586                     | 0.864    |
| 14                                         | How would you compare your current spelling to that of others of the same age and education?                                                 | 1.255    | 1.013     | 0.587                      | 0.544                     | 0.866    |
| 15                                         | Did your parents ever consider having you repeat any grades in school due to academic failure (not illness)?                                 | 0.224    | 0.642     | 0.467                      | 0.418                     | 0.871    |
| 16                                         | Do you ever have difficulty remembering people's names or names of places?                                                                   | 1.480    | 1.196     | 0.440                      | 0.407                     | 0.871    |
| 17                                         | Do you ever have difficulty remembering addresses, phone numbers, or dates?                                                                  | 1.219    | 1.151     | 0.431                      | 0.402                     | 0.871    |
| 18                                         | Do you have difficulty remembering complex verbal instructions?                                                                              | 1.005    | 1.030     | 0.463                      | 0.430                     | 0.870    |
| 19                                         | Do you currently reverse the other of letters or numbers when you read or write?                                                             | 0.352    | 0.823     | 0.461                      | 0.408                     | 0.870    |
| 20                                         | How many books do you read for pleasure each year?                                                                                           | 1.418    | 1.197     | 0.509                      | 0.450                     | 0.869    |
| 21                                         | How many magazines do you read for pleasure each month?                                                                                      | 2.594    | 1.104     | 0.217                      | 0.213                     | 0.876    |
| 22                                         | Do you read daily (Monday-Friday) newspapers?                                                                                                | 2.253    | 1.377     | 0.362                      | 0.335                     | 0.874    |
| 23                                         | Do you read a newspaper on Sunday?                                                                                                           | 2.605    | 1.228     | 0.246                      | 0.219                     | 0.877    |

**1.2. Supplementary Table 2.** Descriptive information on individual items from the *Adult Math History Questionnaire*, which was adapted from the *Adult Reading History Questionnaire* (Lefly & Pennington, 2000).

| Item                                    | Description                                                                                               | <i>m</i> | <i>sd</i> | Item-<br>Total<br><i>r</i> | Item-<br>Rest<br><i>r</i> | $\alpha$ |
|-----------------------------------------|-----------------------------------------------------------------------------------------------------------|----------|-----------|----------------------------|---------------------------|----------|
| <b>Adult Math History Questionnaire</b> |                                                                                                           |          |           |                            |                           |          |
| 1                                       | When in elementary school, I struggled with learning new concepts in math.                                | 0.957    | 1.108     | 0.763                      | 0.722                     | 0.920    |
| 2                                       | When in elementary school, I needed extra help in math from a teacher or tutor.                           | 0.695    | 1.076     | 0.677                      | 0.629                     | 0.922    |
| 3                                       | How would you compare your math skills to those of others in your elementary classes?                     | 1.246    | 1.047     | 0.743                      | 0.712                     | 0.920    |
| 4                                       | Compared to others in your elementary classes, how much did you struggle to complete your math work?      | 0.982    | 1.121     | 0.809                      | 0.769                     | 0.918    |
| 5                                       | During high school or college, I struggled in math courses.                                               | 1.551    | 1.268     | 0.778                      | 0.754                     | 0.919    |
| 6                                       | I took math classes in high school or college that were not required because I enjoyed them.              | 2.810    | 1.410     | 0.532                      | 0.514                     | 0.927    |
| 7                                       | What is your current attitude towards math?                                                               | 1.066    | 1.035     | 0.755                      | 0.724                     | 0.920    |
| 8                                       | Math makes me feel uncomfortable and nervous.                                                             | 1.056    | 1.034     | 0.852                      | 0.824                     | 0.917    |
| 9                                       | As an adult, I struggle to complete math-related tasks, such as calculating tips.                         | 0.700    | 0.900     | 0.705                      | 0.676                     | 0.921    |
| 10                                      | Math is important in everyday life.                                                                       | 0.449    | 0.755     | 0.470                      | 0.433                     | 0.926    |
| 11                                      | My current work requires I use math.                                                                      | 1.285    | 1.190     | 0.422                      | 0.375                     | 0.929    |
| 12                                      | I enjoy completing math and logic puzzles for fun.                                                        | 1.867    | 1.270     | 0.636                      | 0.608                     | 0.923    |
| 13                                      | I use math in my everyday life.                                                                           | 0.715    | 0.919     | 0.567                      | 0.519                     | 0.925    |
| 14                                      | How would you compare your current math skills compared to those of others of the same age and education? | 1.579    | 0.919     | 0.750                      | 0.728                     | 0.920    |
| 15                                      | I would like to further develop my math skills.                                                           | 1.711    | 1.081     | 0.393                      | 0.371                     | 0.928    |
| 16                                      | I feel confident in helping my child with their math homework.                                            | 0.893    | 0.958     | 0.688                      | 0.662                     | 0.922    |
| 17                                      | New math content has usually been easy and enjoyable for me to understand.                                | 1.673    | 1.079     | 0.801                      | 0.781                     | 0.918    |

**1.3. Supplementary Table 3.** Pairwise correlations among items within the *Adult Reading History Questionnaire*. (*Note.* Correlation coefficients in **bold** met  $p < 0.05$ .)

| Adult Reading History Questionnaire |              |              |              |              |              |              |              |              |              |              |              |              |
|-------------------------------------|--------------|--------------|--------------|--------------|--------------|--------------|--------------|--------------|--------------|--------------|--------------|--------------|
| Item                                | 1            | 2            | 3            | 4            | 5            | 6            | 7            | 8            | 9            | 10           | 11           | 12           |
| Adult Reading History Questionnaire |              |              |              |              |              |              |              |              |              |              |              |              |
| 1                                   | -            |              |              |              |              |              |              |              |              |              |              |              |
| 2                                   | <b>0.452</b> | -            |              |              |              |              |              |              |              |              |              |              |
| 3                                   | <b>0.398</b> | <b>0.787</b> | -            |              |              |              |              |              |              |              |              |              |
| 4                                   | 0.092        | <b>0.358</b> | <b>0.335</b> | -            |              |              |              |              |              |              |              |              |
| 5                                   | <b>0.168</b> | <b>0.533</b> | <b>0.472</b> | <b>0.526</b> | -            |              |              |              |              |              |              |              |
| 6                                   | <b>0.373</b> | <b>0.709</b> | <b>0.640</b> | <b>0.358</b> | <b>0.476</b> | -            |              |              |              |              |              |              |
| 7                                   | <b>0.398</b> | <b>0.639</b> | <b>0.584</b> | <b>0.314</b> | <b>0.474</b> | <b>0.638</b> | -            |              |              |              |              |              |
| 8                                   | <b>0.309</b> | <b>0.558</b> | <b>0.517</b> | <b>0.320</b> | <b>0.462</b> | <b>0.595</b> | <b>0.476</b> | -            |              |              |              |              |
| 9                                   | <b>0.222</b> | <b>0.318</b> | <b>0.277</b> | <b>0.161</b> | <b>0.271</b> | <b>0.284</b> | <b>0.283</b> | <b>0.388</b> | -            |              |              |              |
| 10                                  | <b>0.180</b> | <b>0.171</b> | <b>0.115</b> | 0.062        | <b>0.145</b> | <b>0.226</b> | 0.126        | <b>0.241</b> | <b>0.564</b> | -            |              |              |
| 11                                  | <b>0.239</b> | <b>0.388</b> | <b>0.386</b> | <b>0.258</b> | <b>0.286</b> | <b>0.453</b> | <b>0.381</b> | <b>0.354</b> | <b>0.373</b> | <b>0.319</b> | -            |              |
| 12                                  | <b>0.282</b> | <b>0.136</b> | <b>0.175</b> | 0.053        | 0.100        | <b>0.178</b> | <b>0.148</b> | <b>0.235</b> | <b>0.309</b> | <b>0.217</b> | <b>0.322</b> | -            |
| 13                                  | <b>0.310</b> | <b>0.645</b> | <b>0.546</b> | <b>0.494</b> | <b>0.380</b> | <b>0.568</b> | <b>0.571</b> | <b>0.464</b> | <b>0.208</b> | 0.034        | <b>0.355</b> | <b>0.170</b> |
| 14                                  | <b>0.307</b> | <b>0.480</b> | <b>0.448</b> | <b>0.277</b> | <b>0.254</b> | <b>0.439</b> | <b>0.455</b> | <b>0.407</b> | <b>0.195</b> | 0.133        | <b>0.407</b> | <b>0.253</b> |
| 15                                  | <b>0.223</b> | <b>0.446</b> | <b>0.543</b> | 0.068        | <b>0.355</b> | <b>0.411</b> | <b>0.448</b> | <b>0.464</b> | <b>0.186</b> | 0.058        | <b>0.251</b> | 0.123        |
| 16                                  | <b>0.205</b> | <b>0.146</b> | 0.108        | <b>0.190</b> | 0.125        | 0.122        | <b>0.256</b> | 0.119        | 0.092        | <b>0.164</b> | <b>0.168</b> | <b>0.230</b> |
| 17                                  | <b>0.178</b> | <b>0.186</b> | 0.083        | <b>0.154</b> | <b>0.167</b> | <b>0.182</b> | <b>0.268</b> | 0.130        | 0.108        | <b>0.170</b> | <b>0.209</b> | 0.134        |
| 18                                  | <b>0.185</b> | <b>0.172</b> | <b>0.186</b> | 0.111        | <b>0.180</b> | <b>0.155</b> | <b>0.322</b> | <b>0.279</b> | <b>0.150</b> | 0.105        | <b>0.187</b> | <b>0.314</b> |
| 19                                  | 0.119        | <b>0.332</b> | <b>0.286</b> | <b>0.573</b> | <b>0.223</b> | <b>0.296</b> | <b>0.300</b> | <b>0.353</b> | 0.104        | 0.056        | <b>0.293</b> | 0.070        |
| 20                                  | <b>0.265</b> | <b>0.255</b> | <b>0.214</b> | 0.051        | <b>0.191</b> | <b>0.285</b> | <b>0.169</b> | <b>0.261</b> | <b>0.537</b> | <b>0.809</b> | <b>0.345</b> | <b>0.278</b> |
| 21                                  | -0.026       | 0.028        | -0.002       | -0.028       | -0.004       | 0.015        | 0.045        | 0.081        | 0.131        | <b>0.184</b> | 0.025        | <b>0.170</b> |
| 22                                  | 0.116        | 0.064        | 0.048        | -0.050       | 0.074        | 0.119        | <b>0.162</b> | 0.115        | <b>0.170</b> | <b>0.222</b> | <b>0.203</b> | <b>0.219</b> |
| 23                                  | -0.014       | -0.093       | -0.056       | -0.057       | 0.015        | 0.006        | -0.004       | 0.041        | 0.126        | <b>0.175</b> | <b>0.156</b> | <b>0.255</b> |
| <b>ARHQ Total</b>                   | <b>0.489</b> | <b>0.706</b> | <b>0.654</b> | <b>0.433</b> | <b>0.527</b> | <b>0.696</b> | <b>0.684</b> | <b>0.652</b> | <b>0.512</b> | <b>0.455</b> | <b>0.593</b> | <b>0.439</b> |

| Adult Reading History Questionnaire |              |              |              |              |              |              |              |              |              |              |              |
|-------------------------------------|--------------|--------------|--------------|--------------|--------------|--------------|--------------|--------------|--------------|--------------|--------------|
| Item                                | 13           | 14           | 15           | 16           | 17           | 18           | 19           | 20           | 21           | 22           | 23           |
| Adult Reading History Questionnaire |              |              |              |              |              |              |              |              |              |              |              |
| 13                                  | -            |              |              |              |              |              |              |              |              |              |              |
| 14                                  | <b>0.709</b> | -            |              |              |              |              |              |              |              |              |              |
| 15                                  | <b>0.300</b> | <b>0.241</b> | -            |              |              |              |              |              |              |              |              |
| 16                                  | <b>0.242</b> | <b>0.148</b> | 0.029        | -            |              |              |              |              |              |              |              |
| 17                                  | <b>0.236</b> | <b>0.197</b> | 0.081        | <b>0.652</b> | -            |              |              |              |              |              |              |
| 18                                  | <b>0.258</b> | <b>0.188</b> | <b>0.196</b> | <b>0.583</b> | <b>0.472</b> | -            |              |              |              |              |              |
| 19                                  | <b>0.399</b> | <b>0.266</b> | <b>0.281</b> | <b>0.209</b> | <b>0.217</b> | <b>0.294</b> | -            |              |              |              |              |
| 20                                  | 0.110        | <b>0.187</b> | 0.126        | <b>0.182</b> | <b>0.187</b> | <b>0.141</b> | 0.062        | -            |              |              |              |
| 21                                  | -0.002       | 0.123        | 0.043        | <b>0.152</b> | <b>0.167</b> | 0.132        | 0.033        | 0.134        | -            |              |              |
| 22                                  | 0.045        | <b>0.158</b> | 0.077        | <b>0.192</b> | <b>0.225</b> | <b>0.152</b> | 0.027        | <b>0.258</b> | <b>0.423</b> | -            |              |
| 23                                  | -0.115       | -0.008       | 0.034        | <b>0.231</b> | 0.122        | <b>0.147</b> | 0.066        | <b>0.188</b> | <b>0.423</b> | <b>0.668</b> | -            |
| <b>ARHQ Total</b>                   | <b>0.644</b> | <b>0.591</b> | <b>0.477</b> | <b>0.482</b> | <b>0.472</b> | <b>0.485</b> | <b>0.458</b> | <b>0.526</b> | <b>0.286</b> | <b>0.419</b> | <b>0.314</b> |

**1.4. Supplementary Table 4.** Pairwise correlations between items from the *Adult Reading History Questionnaire* (columns) and those from the *Adult Math History Questionnaire* (rows). (*Note.* Correlation coefficients in **bold** met  $p < 0.05$ .)

| Item                                    | Adult Reading History Questionnaire |              |              |              |              |              |              |              |              |        |              |              |
|-----------------------------------------|-------------------------------------|--------------|--------------|--------------|--------------|--------------|--------------|--------------|--------------|--------|--------------|--------------|
|                                         | 1                                   | 2            | 3            | 4            | 5            | 6            | 7            | 8            | 9            | 10     | 11           | 12           |
| <b>Adult Math History Questionnaire</b> |                                     |              |              |              |              |              |              |              |              |        |              |              |
| 1                                       | <b>0.287</b>                        | <b>0.380</b> | <b>0.314</b> | <b>0.138</b> | <b>0.210</b> | <b>0.267</b> | <b>0.534</b> | <b>0.199</b> | 0.129        | 0.015  | 0.114        | 0.012        |
| 2                                       | <b>0.303</b>                        | <b>0.381</b> | <b>0.328</b> | <b>0.220</b> | <b>0.281</b> | <b>0.273</b> | <b>0.512</b> | <b>0.251</b> | 0.118        | -0.003 | <b>0.137</b> | -0.020       |
| 3                                       | <b>0.337</b>                        | <b>0.375</b> | <b>0.387</b> | <b>0.167</b> | <b>0.186</b> | <b>0.426</b> | <b>0.604</b> | <b>0.196</b> | 0.123        | 0.064  | <b>0.248</b> | 0.006        |
| 4                                       | <b>0.358</b>                        | <b>0.400</b> | <b>0.390</b> | <b>0.176</b> | <b>0.222</b> | <b>0.348</b> | <b>0.604</b> | <b>0.182</b> | <b>0.150</b> | 0.018  | <b>0.185</b> | 0.021        |
| 5                                       | <b>0.215</b>                        | <b>0.279</b> | <b>0.275</b> | 0.098        | <b>0.172</b> | <b>0.210</b> | <b>0.457</b> | 0.096        | 0.065        | -0.009 | 0.087        | -0.002       |
| 6                                       | 0.116                               | 0.078        | 0.044        | 0.075        | 0.039        | 0.073        | <b>0.202</b> | -0.067       | 0.029        | 0.038  | -0.018       | 0.061        |
| 7                                       | <b>0.141</b>                        | 0.094        | 0.019        | 0.082        | 0.024        | -0.010       | <b>0.173</b> | -0.065       | -0.019       | 0.007  | -0.135       | 0.068        |
| 8                                       | <b>0.168</b>                        | <b>0.227</b> | <b>0.166</b> | <b>0.150</b> | <b>0.145</b> | <b>0.144</b> | <b>0.371</b> | 0.027        | 0.064        | -0.027 | 0.098        | 0.066        |
| 9                                       | <b>0.165</b>                        | <b>0.269</b> | <b>0.274</b> | <b>0.197</b> | <b>0.206</b> | <b>0.297</b> | <b>0.422</b> | <b>0.148</b> | 0.120        | 0.001  | <b>0.173</b> | 0.025        |
| 10                                      | <b>0.166</b>                        | 0.062        | 0.098        | 0.109        | 0.057        | 0.110        | <b>0.193</b> | 0.032        | 0.023        | -0.030 | -0.126       | 0.103        |
| 11                                      | 0.117                               | <b>0.138</b> | 0.113        | 0.064        | 0.100        | <b>0.169</b> | <b>0.186</b> | -0.030       | 0.067        | -0.072 | 0.093        | <b>0.219</b> |
| 12                                      | <b>0.181</b>                        | 0.034        | 0.054        | 0.074        | 0.084        | 0.079        | <b>0.207</b> | 0.032        | 0.061        | 0.002  | -0.047       | 0.099        |
| 13                                      | <b>0.234</b>                        | <b>0.148</b> | <b>0.156</b> | 0.091        | <b>0.149</b> | <b>0.212</b> | <b>0.287</b> | 0.082        | 0.114        | -0.021 | 0.047        | <b>0.331</b> |
| 14                                      | <b>0.188</b>                        | <b>0.254</b> | <b>0.237</b> | 0.084        | 0.048        | <b>0.229</b> | <b>0.367</b> | 0.018        | 0.018        | -0.051 | <b>0.147</b> | 0.046        |
| 15                                      | <b>0.157</b>                        | -0.008       | 0.008        | 0.066        | -0.020       | 0.031        | 0.107        | -0.028       | 0.062        | 0.058  | -0.005       | <b>0.220</b> |
| 16                                      | <b>0.268</b>                        | <b>0.246</b> | <b>0.225</b> | <b>0.166</b> | <b>0.139</b> | <b>0.226</b> | <b>0.406</b> | <b>0.177</b> | 0.092        | 0.036  | 0.117        | 0.079        |
| 17                                      | <b>0.250</b>                        | <b>0.220</b> | <b>0.198</b> | 0.044        | 0.110        | <b>0.204</b> | <b>0.400</b> | 0.115        | 0.096        | -0.003 | <b>0.145</b> | 0.068        |
| <b>AMHQ Total</b>                       | <b>0.317</b>                        | <b>0.309</b> | <b>0.279</b> | <b>0.176</b> | <b>0.195</b> | <b>0.278</b> | <b>0.520</b> | 0.130        | 0.125        | 0.013  | 0.106        | 0.111        |

| Adult Reading History Questionnaire     |              |              |              |              |              |              |              |              |              |              |        |
|-----------------------------------------|--------------|--------------|--------------|--------------|--------------|--------------|--------------|--------------|--------------|--------------|--------|
| Item                                    | 13           | 14           | 15           | 16           | 17           | 18           | 19           | 20           | 21           | 22           | 23     |
| <b>Adult Math History Questionnaire</b> |              |              |              |              |              |              |              |              |              |              |        |
| 1                                       | <b>0.328</b> | <b>0.225</b> | <b>0.326</b> | <b>0.154</b> | <b>0.230</b> | <b>0.213</b> | <b>0.139</b> | 0.096        | -0.035       | 0.097        | -0.086 |
| 2                                       | <b>0.367</b> | <b>0.249</b> | <b>0.358</b> | 0.072        | <b>0.182</b> | <b>0.162</b> | <b>0.165</b> | 0.111        | -0.041       | 0.075        | -0.023 |
| 3                                       | <b>0.364</b> | <b>0.287</b> | <b>0.316</b> | 0.081        | <b>0.143</b> | 0.111        | <b>0.158</b> | <b>0.147</b> | -0.042       | 0.068        | -0.086 |
| 4                                       | <b>0.379</b> | <b>0.254</b> | <b>0.302</b> | <b>0.179</b> | <b>0.232</b> | <b>0.246</b> | <b>0.165</b> | 0.123        | -0.032       | 0.117        | -0.037 |
| 5                                       | <b>0.221</b> | 0.092        | <b>0.243</b> | <b>0.146</b> | <b>0.219</b> | <b>0.162</b> | 0.080        | 0.061        | -0.013       | 0.051        | -0.090 |
| 6                                       | 0.011        | 0.005        | 0.080        | 0.017        | <b>0.150</b> | 0.040        | 0.036        | 0.048        | 0.065        | 0.123        | -0.010 |
| 7                                       | 0.084        | 0.024        | 0.086        | 0.109        | 0.124        | 0.068        | 0.004        | -0.014       | -0.043       | -0.025       | -0.052 |
| 8                                       | <b>0.177</b> | 0.092        | <b>0.188</b> | 0.113        | <b>0.166</b> | <b>0.139</b> | 0.127        | 0.025        | 0.032        | 0.019        | -0.026 |
| 9                                       | <b>0.204</b> | <b>0.155</b> | <b>0.277</b> | <b>0.161</b> | <b>0.269</b> | <b>0.264</b> | <b>0.198</b> | 0.050        | 0.002        | 0.058        | -0.020 |
| 10                                      | 0.106        | 0.111        | 0.032        | -0.013       | 0.010        | 0.000        | 0.003        | 0.050        | -0.021       | -0.015       | -0.061 |
| 11                                      | 0.072        | <b>0.145</b> | 0.084        | -0.074       | -0.029       | 0.085        | 0.034        | -0.037       | -0.039       | 0.031        | -0.023 |
| 12                                      | 0.029        | 0.045        | <b>0.201</b> | 0.078        | 0.048        | 0.092        | 0.057        | -0.031       | 0.128        | 0.021        | 0.057  |
| 13                                      | 0.131        | <b>0.145</b> | 0.123        | 0.033        | 0.036        | 0.126        | -0.030       | 0.004        | 0.046        | 0.070        | 0.020  |
| 14                                      | <b>0.193</b> | <b>0.211</b> | <b>0.208</b> | 0.082        | 0.111        | 0.135        | 0.095        | -0.020       | 0.043        | 0.076        | -0.024 |
| 15                                      | -0.052       | 0.034        | 0.001        | -0.050       | -0.027       | -0.063       | -0.018       | 0.092        | <b>0.157</b> | <b>0.141</b> | 0.043  |
| 16                                      | 0.135        | <b>0.167</b> | <b>0.290</b> | 0.123        | 0.060        | <b>0.184</b> | <b>0.158</b> | 0.038        | 0.033        | 0.036        | 0.019  |
| 17                                      | 0.137        | <b>0.177</b> | <b>0.217</b> | 0.091        | <b>0.162</b> | <b>0.174</b> | 0.055        | 0.062        | 0.032        | 0.136        | 0.024  |
| <b>AMHQ Total</b>                       | <b>0.244</b> | <b>0.194</b> | <b>0.288</b> | 0.108        | <b>0.186</b> | <b>0.190</b> | 0.128        | 0.071        | 0.019        | 0.076        | -0.041 |

**1.5. Supplementary Table 5.** Pairwise correlations among items within the *Adult Math History Questionnaire*. (*Note.* Correlation coefficients in **bold** met  $p < 0.05$ .)

| Adult Math History Questionnaire |              |              |              |              |              |              |              |              |              |              |              |              |
|----------------------------------|--------------|--------------|--------------|--------------|--------------|--------------|--------------|--------------|--------------|--------------|--------------|--------------|
| Item                             | 1            | 2            | 3            | 4            | 5            | 6            | 7            | 8            | 9            | 10           | 11           | 12           |
| Adult Math History Questionnaire |              |              |              |              |              |              |              |              |              |              |              |              |
| 1                                | -            |              |              |              |              |              |              |              |              |              |              |              |
| 2                                | <b>0.857</b> | -            |              |              |              |              |              |              |              |              |              |              |
| 3                                | <b>0.727</b> | <b>0.661</b> | -            |              |              |              |              |              |              |              |              |              |
| 4                                | <b>0.822</b> | <b>0.780</b> | <b>0.808</b> | -            |              |              |              |              |              |              |              |              |
| 5                                | <b>0.663</b> | <b>0.567</b> | <b>0.651</b> | <b>0.706</b> | -            |              |              |              |              |              |              |              |
| 6                                | <b>0.370</b> | <b>0.257</b> | <b>0.396</b> | <b>0.354</b> | <b>0.513</b> | -            |              |              |              |              |              |              |
| 7                                | <b>0.453</b> | <b>0.378</b> | <b>0.414</b> | <b>0.459</b> | <b>0.624</b> | <b>0.501</b> | -            |              |              |              |              |              |
| 8                                | <b>0.621</b> | <b>0.511</b> | <b>0.580</b> | <b>0.621</b> | <b>0.705</b> | <b>0.465</b> | <b>0.766</b> | -            |              |              |              |              |
| 9                                | <b>0.550</b> | <b>0.517</b> | <b>0.474</b> | <b>0.612</b> | <b>0.549</b> | <b>0.288</b> | <b>0.509</b> | <b>0.651</b> | -            |              |              |              |
| 10                               | <b>0.250</b> | <b>0.263</b> | <b>0.290</b> | <b>0.296</b> | <b>0.236</b> | <b>0.186</b> | <b>0.426</b> | <b>0.357</b> | <b>0.292</b> | -            |              |              |
| 11                               | <b>0.155</b> | <b>0.150</b> | <b>0.198</b> | <b>0.228</b> | <b>0.227</b> | <b>0.189</b> | <b>0.277</b> | <b>0.330</b> | <b>0.348</b> | <b>0.281</b> | -            |              |
| 12                               | <b>0.356</b> | <b>0.307</b> | <b>0.376</b> | <b>0.420</b> | <b>0.417</b> | <b>0.328</b> | <b>0.569</b> | <b>0.587</b> | <b>0.438</b> | <b>0.334</b> | <b>0.280</b> | -            |
| 13                               | <b>0.317</b> | <b>0.272</b> | <b>0.331</b> | <b>0.396</b> | <b>0.320</b> | <b>0.232</b> | <b>0.342</b> | <b>0.379</b> | <b>0.388</b> | <b>0.566</b> | <b>0.601</b> | <b>0.332</b> |
| 14                               | <b>0.481</b> | <b>0.389</b> | <b>0.543</b> | <b>0.567</b> | <b>0.598</b> | <b>0.431</b> | <b>0.629</b> | <b>0.668</b> | <b>0.592</b> | <b>0.256</b> | <b>0.365</b> | <b>0.508</b> |
| 15                               | <b>0.165</b> | 0.129        | <b>0.226</b> | <b>0.174</b> | <b>0.207</b> | <b>0.354</b> | <b>0.370</b> | <b>0.289</b> | 0.127        | <b>0.280</b> | <b>0.148</b> | <b>0.414</b> |
| 16                               | <b>0.466</b> | <b>0.378</b> | <b>0.468</b> | <b>0.486</b> | <b>0.474</b> | <b>0.320</b> | <b>0.545</b> | <b>0.623</b> | <b>0.531</b> | <b>0.319</b> | <b>0.262</b> | <b>0.509</b> |
| 17                               | <b>0.584</b> | <b>0.488</b> | <b>0.576</b> | <b>0.619</b> | <b>0.677</b> | <b>0.466</b> | <b>0.605</b> | <b>0.735</b> | <b>0.556</b> | <b>0.268</b> | <b>0.302</b> | <b>0.563</b> |
| <b>AMHQ Total</b>                | <b>0.759</b> | <b>0.677</b> | <b>0.749</b> | <b>0.799</b> | <b>0.798</b> | <b>0.596</b> | <b>0.763</b> | <b>0.850</b> | <b>0.704</b> | <b>0.467</b> | <b>0.438</b> | <b>0.669</b> |

| Adult Math History Questionnaire |              |              |              |              |              |
|----------------------------------|--------------|--------------|--------------|--------------|--------------|
| Item                             | 13           | 14           | 15           | 16           | 17           |
| Adult Math History Questionnaire |              |              |              |              |              |
| 13                               | -            |              |              |              |              |
| 14                               | 0.333        | -            |              |              |              |
| 15                               | 0.267        | 0.321        | -            |              |              |
| 16                               | 0.401        | 0.554        | 0.336        | -            |              |
| 17                               | 0.361        | 0.659        | 0.336        | 0.620        | -            |
| <b>AMHQ Total</b>                | <b>0.546</b> | <b>0.753</b> | <b>0.448</b> | <b>0.700</b> | <b>0.816</b> |



**1.6. Supplementary Table 6.** Pairwise correlations between items from the *Adult Math History Questionnaire* (columns) and those from the *Adult Reading History Questionnaire* (rows). (*Note.* Correlation coefficients in **bold** met  $p < 0.05$ .)

| Item                                       | Adult Math History Questionnaire |              |              |              |              |              |              |              |              |              |              |              |
|--------------------------------------------|----------------------------------|--------------|--------------|--------------|--------------|--------------|--------------|--------------|--------------|--------------|--------------|--------------|
|                                            | 1                                | 2            | 3            | 4            | 5            | 6            | 7            | 8            | 9            | 10           | 11           | 12           |
| <b>Adult Reading History Questionnaire</b> |                                  |              |              |              |              |              |              |              |              |              |              |              |
| 1                                          | <b>0.287</b>                     | <b>0.303</b> | <b>0.337</b> | <b>0.358</b> | <b>0.215</b> | 0.116        | <b>0.141</b> | <b>0.168</b> | <b>0.165</b> | <b>0.166</b> | 0.117        | <b>0.181</b> |
| 2                                          | <b>0.380</b>                     | <b>0.381</b> | <b>0.375</b> | <b>0.400</b> | <b>0.279</b> | 0.078        | 0.094        | <b>0.227</b> | <b>0.269</b> | 0.062        | <b>0.138</b> | 0.034        |
| 3                                          | <b>0.314</b>                     | <b>0.328</b> | <b>0.387</b> | <b>0.390</b> | <b>0.275</b> | 0.044        | 0.019        | <b>0.166</b> | <b>0.274</b> | 0.098        | 0.113        | 0.054        |
| 4                                          | <b>0.138</b>                     | <b>0.220</b> | <b>0.167</b> | 0.176        | 0.098        | 0.075        | 0.082        | <b>0.150</b> | <b>0.197</b> | 0.109        | 0.064        | 0.074        |
| 5                                          | <b>0.210</b>                     | <b>0.281</b> | <b>0.186</b> | <b>0.222</b> | <b>0.172</b> | 0.039        | 0.024        | <b>0.145</b> | <b>0.206</b> | 0.057        | 0.100        | 0.084        |
| 6                                          | <b>0.267</b>                     | <b>0.273</b> | <b>0.426</b> | <b>0.348</b> | <b>0.210</b> | 0.073        | -0.010       | <b>0.144</b> | <b>0.297</b> | 0.110        | <b>0.169</b> | 0.079        |
| 7                                          | <b>0.534</b>                     | <b>0.512</b> | <b>0.604</b> | <b>0.604</b> | <b>0.457</b> | <b>0.202</b> | <b>0.173</b> | <b>0.371</b> | <b>0.422</b> | <b>0.193</b> | <b>0.186</b> | <b>0.207</b> |
| 8                                          | <b>0.199</b>                     | <b>0.251</b> | <b>0.196</b> | 0.182        | 0.096        | -0.067       | -0.065       | 0.027        | <b>0.148</b> | 0.032        | -0.030       | 0.032        |
| 9                                          | 0.129                            | 0.118        | 0.123        | 0.150        | 0.065        | 0.029        | -0.019       | 0.064        | 0.120        | 0.023        | 0.067        | 0.061        |
| 10                                         | 0.015                            | -0.003       | 0.064        | 0.018        | -0.009       | 0.038        | 0.007        | -0.027       | 0.001        | -0.030       | -0.072       | 0.002        |
| 11                                         | 0.114                            | 0.137        | <b>0.248</b> | 0.185        | 0.087        | -0.018       | -0.135       | 0.098        | <b>0.173</b> | -0.126       | 0.093        | -0.047       |
| 12                                         | 0.012                            | -0.020       | 0.006        | 0.021        | -0.002       | 0.061        | 0.068        | 0.066        | 0.025        | 0.103        | <b>0.219</b> | 0.099        |
| 13                                         | <b>0.328</b>                     | <b>0.367</b> | <b>0.364</b> | 0.379        | <b>0.221</b> | 0.011        | 0.084        | <b>0.177</b> | <b>0.204</b> | 0.106        | 0.072        | 0.029        |
| 14                                         | <b>0.225</b>                     | <b>0.249</b> | <b>0.287</b> | 0.254        | 0.092        | 0.005        | 0.024        | 0.092        | <b>0.155</b> | 0.111        | <b>0.145</b> | 0.045        |
| 15                                         | <b>0.326</b>                     | <b>0.358</b> | <b>0.316</b> | 0.302        | <b>0.243</b> | 0.080        | 0.086        | <b>0.188</b> | <b>0.277</b> | 0.032        | 0.084        | <b>0.201</b> |
| 16                                         | <b>0.154</b>                     | 0.072        | 0.081        | 0.179        | <b>0.146</b> | 0.017        | 0.109        | 0.113        | <b>0.161</b> | -0.013       | -0.074       | 0.078        |
| 17                                         | <b>0.230</b>                     | <b>0.182</b> | <b>0.143</b> | 0.232        | <b>0.219</b> | 0.150        | 0.124        | <b>0.166</b> | <b>0.269</b> | 0.010        | -0.029       | 0.048        |
| 18                                         | <b>0.213</b>                     | <b>0.162</b> | 0.111        | 0.246        | <b>0.162</b> | 0.040        | 0.068        | <b>0.139</b> | <b>0.264</b> | 0.000        | 0.085        | 0.092        |
| 19                                         | <b>0.139</b>                     | <b>0.165</b> | <b>0.158</b> | 0.165        | 0.080        | 0.036        | 0.004        | 0.127        | <b>0.198</b> | 0.003        | 0.034        | 0.057        |
| 20                                         | 0.096                            | <b>0.111</b> | <b>0.147</b> | 0.123        | 0.061        | 0.048        | -0.014       | 0.025        | 0.050        | 0.050        | -0.037       | -0.031       |
| 21                                         | -0.035                           | -0.041       | -0.042       | -0.032       | -0.013       | 0.065        | -0.043       | 0.032        | 0.002        | -0.021       | -0.039       | 0.128        |
| 22                                         | 0.097                            | 0.075        | 0.068        | 0.117        | 0.051        | 0.123        | -0.025       | 0.019        | 0.058        | -0.015       | 0.031        | 0.021        |
| 23                                         | -0.086                           | -0.023       | -0.086       | -0.037       | -0.090       | -0.010       | -0.052       | -0.026       | -0.020       | -0.061       | -0.023       | 0.057        |
| <b>ARHQ Total</b>                          | <b>0.354</b>                     | <b>0.368</b> | <b>0.382</b> | <b>0.412</b> | <b>0.249</b> | 0.094        | 0.063        | <b>0.218</b> | <b>0.314</b> | 0.077        | 0.104        | 0.129        |

| Adult Math History Questionnaire    |              |              |              |              |              |
|-------------------------------------|--------------|--------------|--------------|--------------|--------------|
| Item                                | 13           | 14           | 15           | 16           | 17           |
| Adult Reading History Questionnaire |              |              |              |              |              |
| 1                                   | <b>0.234</b> | <b>0.188</b> | <b>0.157</b> | <b>0.268</b> | <b>0.250</b> |
| 2                                   | <b>0.148</b> | <b>0.254</b> | -0.008       | <b>0.246</b> | <b>0.220</b> |
| 3                                   | <b>0.156</b> | <b>0.237</b> | 0.008        | <b>0.225</b> | <b>0.198</b> |
| 4                                   | 0.091        | 0.084        | 0.066        | <b>0.166</b> | 0.044        |
| 5                                   | <b>0.149</b> | 0.048        | -0.020       | <b>0.139</b> | 0.110        |
| 6                                   | <b>0.212</b> | <b>0.229</b> | 0.031        | <b>0.226</b> | <b>0.204</b> |
| 7                                   | <b>0.287</b> | <b>0.367</b> | 0.107        | <b>0.406</b> | <b>0.400</b> |
| 8                                   | 0.082        | 0.018        | -0.028       | <b>0.177</b> | 0.115        |
| 9                                   | 0.114        | 0.018        | 0.062        | 0.092        | 0.096        |
| 10                                  | -0.021       | -0.051       | 0.058        | 0.036        | -0.003       |
| 11                                  | 0.047        | <b>0.147</b> | -0.005       | 0.117        | <b>0.145</b> |
| 12                                  | <b>0.331</b> | 0.046        | <b>0.220</b> | 0.079        | 0.068        |
| 13                                  | 0.131        | <b>0.193</b> | -0.052       | 0.135        | 0.137        |
| 14                                  | <b>0.145</b> | <b>0.211</b> | 0.034        | <b>0.167</b> | <b>0.177</b> |
| 15                                  | 0.123        | <b>0.208</b> | 0.001        | <b>0.290</b> | <b>0.217</b> |
| 16                                  | 0.033        | 0.082        | -0.050       | 0.123        | 0.091        |
| 17                                  | 0.036        | 0.111        | -0.027       | 0.060        | <b>0.162</b> |
| 18                                  | 0.126        | 0.135        | -0.063       | <b>0.184</b> | <b>0.174</b> |
| 19                                  | -0.030       | 0.095        | -0.018       | <b>0.158</b> | 0.055        |
| 20                                  | 0.004        | -0.020       | 0.092        | 0.038        | 0.062        |
| 21                                  | 0.046        | 0.043        | <b>0.157</b> | 0.033        | 0.032        |
| 22                                  | 0.070        | 0.076        | <b>0.141</b> | 0.036        | 0.136        |
| 23                                  | 0.020        | -0.024       | 0.043        | 0.019        | 0.024        |
| <b>ARHQ Total</b>                   | <b>0.196</b> | <b>0.218</b> | 0.077        | <b>0.272</b> | <b>0.261</b> |

**1.7. Supplementary Table 7.** Pairwise correlations between self-report (ARHQ and AMHQ; including total and factor scores [*italicized*] under each scale) and performance-based data collected from parents. (*Note.* Analyses were conducted for both scores on individual subtests and composite clusters from the *Woodcock-Johnson III* [Woodcock et al., 2001]. Correlation coefficients in **bold** met  $p < 0.05$ .)

|                                   | 1            | 2            | 3            | 4           | 5            | 6            | 7            | 8            | 9            | 10           |
|-----------------------------------|--------------|--------------|--------------|-------------|--------------|--------------|--------------|--------------|--------------|--------------|
| <b>Self-Report Measures</b>       |              |              |              |             |              |              |              |              |              |              |
| <b>Reading</b>                    |              |              |              |             |              |              |              |              |              |              |
| 1 ARHQ (Total)                    | -            |              |              |             |              |              |              |              |              |              |
| 2 <i>Childhood Ability</i>        | <b>0.80</b>  | -            |              |             |              |              |              |              |              |              |
| 3 <i>Attitude &amp; Exposure</i>  | <b>0.55</b>  | <b>0.27</b>  | -            |             |              |              |              |              |              |              |
| 4 <i>Memory</i>                   | <b>0.60</b>  | <b>0.26</b>  | <b>0.22</b>  | -           |              |              |              |              |              |              |
| 5 <i>Media Use</i>                | <b>0.40</b>  | 0.01         | <b>0.28</b>  | <b>0.28</b> | -            |              |              |              |              |              |
| 6 <i>Reversal</i>                 | <b>0.44</b>  | <b>0.39</b>  | 0.08         | <b>0.22</b> | -0.06        | -            |              |              |              |              |
| 7 <i>Spelling</i>                 | <b>0.68</b>  | <b>0.64</b>  | <b>0.19</b>  | <b>0.30</b> | 0.03         | <b>0.34</b>  | -            |              |              |              |
| <b>Math</b>                       |              |              |              |             |              |              |              |              |              |              |
| 8 AMHQ (Total)                    | <b>0.33</b>  | <b>0.37</b>  | 0.05         | <b>0.19</b> | -0.01        | <b>0.18</b>  | <b>0.24</b>  | -            |              |              |
| 9 <i>Childhood Ability</i>        | <b>0.41</b>  | <b>0.48</b>  | 0.07         | <b>0.24</b> | -0.03        | <b>0.19</b>  | <b>0.34</b>  | <b>0.81</b>  | -            |              |
| 10 <i>Attitude &amp; Exposure</i> | <b>0.24</b>  | <b>0.27</b>  | 0.02         | <b>0.18</b> | 0.00         | 0.13         | <b>0.17</b>  | <b>0.95</b>  | <b>0.68</b>  | -            |
| <b>Performance-Based Measures</b> |              |              |              |             |              |              |              |              |              |              |
| <b>Reading</b>                    |              |              |              |             |              |              |              |              |              |              |
| 11 Letter-Word Identification     | <b>-0.43</b> | <b>-0.47</b> | <b>-0.23</b> | 0.00        | -0.12        | -0.13        | <b>-0.48</b> | <b>-0.17</b> | <b>-0.21</b> | -0.12        |
| 12 Word Attack                    | <b>-0.31</b> | <b>-0.34</b> | -0.15        | 0.03        | 0.00         | <b>-0.16</b> | <b>-0.40</b> | -0.15        | <b>-0.21</b> | -0.10        |
| 13 Sentence Reading Fluency       | <b>-0.42</b> | <b>-0.45</b> | <b>-0.24</b> | 0.04        | -0.11        | <b>-0.18</b> | <b>-0.37</b> | -0.02        | -0.09        | 0.03         |
| 14 Basic Reading (Composite)      | <b>-0.41</b> | <b>-0.45</b> | <b>-0.21</b> | 0.01        | -0.07        | -0.15        | <b>-0.48</b> | <b>-0.17</b> | <b>-0.23</b> | -0.12        |
| <b>Math</b>                       |              |              |              |             |              |              |              |              |              |              |
| 15 Calculation                    | <b>-0.20</b> | <b>-0.31</b> | 0.00         | 0.08        | 0.00         | <b>-0.21</b> | <b>-0.23</b> | <b>-0.53</b> | <b>-0.51</b> | <b>-0.49</b> |
| 16 Math Facts Fluency             | <b>-0.30</b> | <b>-0.30</b> | -0.03        | -0.02       | -0.11        | <b>-0.20</b> | <b>-0.31</b> | <b>-0.41</b> | <b>-0.43</b> | <b>-0.38</b> |
| 17 Math Calculation (Composite)   | <b>-0.28</b> | <b>-0.34</b> | -0.02        | 0.00        | -0.06        | <b>-0.22</b> | <b>-0.30</b> | <b>-0.52</b> | <b>-0.52</b> | <b>-0.48</b> |
| <b>Background Measure</b>         |              |              |              |             |              |              |              |              |              |              |
| 18 Educational Attainment         | <b>-0.23</b> | <b>-0.26</b> | <b>-0.18</b> | 0.00        | <b>-0.17</b> | -0.06        | -0.10        | <b>-0.21</b> | <b>-0.16</b> | <b>-0.21</b> |

|                                   | 11          | 12          | 13          | 14          | 15          | 16          | 17          | 18 |
|-----------------------------------|-------------|-------------|-------------|-------------|-------------|-------------|-------------|----|
| <b>Performance-Based Measures</b> |             |             |             |             |             |             |             |    |
| <b><i>Reading</i></b>             |             |             |             |             |             |             |             |    |
| 11 Letter-Word Identification     | -           |             |             |             |             |             |             |    |
| 12 Word Attack                    | <b>0.66</b> | -           |             |             |             |             |             |    |
| 13 Sentence Reading Fluency       | <b>0.60</b> | <b>0.45</b> | -           |             |             |             |             |    |
| 14 Basic Reading (Composite)      | <b>0.93</b> | <b>0.89</b> | <b>0.58</b> | -           |             |             |             |    |
| <b><i>Math</i></b>                |             |             |             |             |             |             |             |    |
| 15 Calculation                    | <b>0.44</b> | <b>0.36</b> | <b>0.33</b> | <b>0.44</b> | -           |             |             |    |
| 16 Math Facts Fluency             | <b>0.35</b> | <b>0.30</b> | <b>0.53</b> | <b>0.36</b> | <b>0.64</b> | -           |             |    |
| 17 Math Calculation (Composite)   | <b>0.44</b> | <b>0.37</b> | <b>0.48</b> | <b>0.44</b> | <b>0.90</b> | <b>0.92</b> | -           |    |
| <b>Background Measure</b>         |             |             |             |             |             |             |             |    |
| 18 Educational Attainment         | <b>0.34</b> | <b>0.22</b> | <b>0.31</b> | <b>0.31</b> | <b>0.35</b> | <b>0.28</b> | <b>0.35</b> | -  |

**1.8. Supplementary Table 8.** Pairwise correlations between scores (total and factor) on the ARHQ and AMHQ and measures of children's core academic skills (word recognition [WR] and arithmetic calculation [AR]), and performance on complex tasks (reading comprehension [RC] and problem solving [PS]). (*Note.* Correlation coefficients in **bold** met  $p < 0.05$ .)

|                                  | ARHQ         |                   |                     |        |              |          |              | AMHQ         |                   |                     |
|----------------------------------|--------------|-------------------|---------------------|--------|--------------|----------|--------------|--------------|-------------------|---------------------|
|                                  | Total        | Childhood Ability | Attitude & Exposure | Memory | Media Use    | Reversal | Spelling     | Total        | Childhood Ability | Attitude & Exposure |
| <b>Core Academic Skills</b>      |              |                   |                     |        |              |          |              |              |                   |                     |
| WR (after 1 <sup>st</sup> grade) | <b>-0.19</b> | <b>-0.24</b>      | -0.11               | 0.08   | -0.07        | -0.07    | <b>-0.16</b> | -0.08        | <b>-0.20</b>      | -0.06               |
| WR (after 2 <sup>nd</sup> grade) | <b>-0.17</b> | <b>-0.20</b>      | -0.10               | 0.07   | -0.09        | -0.06    | -0.11        | -0.04        | -0.15             | -0.04               |
| AR (after 1 <sup>st</sup> grade) | <b>-0.14</b> | <b>-0.15</b>      | -0.09               | 0.04   | -0.10        | -0.03    | -0.09        | <b>-0.17</b> | <b>-0.23</b>      | -0.12               |
| AR (after 2 <sup>nd</sup> grade) | <b>-0.20</b> | <b>-0.15</b>      | -0.14               | -0.06  | <b>-0.19</b> | -0.13    | -0.05        | <b>-0.29</b> | <b>-0.31</b>      | <b>-0.27</b>        |
| <b>Complex Academic Tasks</b>    |              |                   |                     |        |              |          |              |              |                   |                     |
| RC (after 2 <sup>nd</sup> grade) | <b>-0.18</b> | <b>-0.16</b>      | <b>-0.16</b>        | 0.04   | <b>-0.22</b> | 0.04     | 0.00         | 0.00         | -0.09             | 0.03                |
| RC (after 3 <sup>rd</sup> grade) | <b>-0.17</b> | -0.14             | <b>-0.24</b>        | 0.06   | -0.13        | -0.04    | 0.06         | -0.06        | -0.10             | -0.06               |
| PS (after 2 <sup>nd</sup> grade) | <b>-0.26</b> | <b>-0.26</b>      | <b>-0.27</b>        | 0.01   | <b>-0.19</b> | -0.09    | -0.03        | -0.13        | <b>-0.21</b>      | -0.09               |
| PS (after 3 <sup>rd</sup> grade) | -0.13        | 0.00              | <b>-0.25</b>        | -0.10  | -0.16        | 0.02     | 0.09         | 0.00         | 0.02              | 0.00                |

**1.9. Supplementary Table 9.** Covariances among factors derived from the ARHQ and AMHQ reported in the final path model and **Supplementary Figure 2.** (*Note.* All coefficients shown met  $p < 0.05$ .)

|                       | 1     | 2     | 3     | 4 | 5     | 6     | 7     | 8 |
|-----------------------|-------|-------|-------|---|-------|-------|-------|---|
| <b>ARHQ Factors</b>   |       |       |       |   |       |       |       |   |
| 1 Childhood Ability   | -     |       |       |   |       |       |       |   |
| 2 Attitude & Exposure | 0.206 | -     |       |   |       |       |       |   |
| 3 Memory              | 0.137 | 0.200 | -     |   |       |       |       |   |
| 4 Media Use           | -     | 0.266 | 0.278 | - |       |       |       |   |
| 5 Reversal            | 0.304 | -     | -     | - | -     |       |       |   |
| 6 Spelling            | 0.576 | 0.136 | 0.206 | - | 0.251 | -     |       |   |
| <b>AMHQ Factors</b>   |       |       |       |   |       |       |       |   |
| 7 Childhood Ability   | 0.271 | -     | 0.205 | - | -     | 0.194 | -     |   |
| 8 Attitude & Exposure | -     | -     | 1.450 | - | -     | -     | 0.600 | - |

## 2. Supplementary Figure

- 2.1. **Supplementary Figure 1.** Initial (full) path model to be evaluated for the direct and indirect effects of familial history of reading and math difficulties (i.e., indexed by ARHQ and AMHQ, respectively) on academic measures on children's core academic skills (word reading [WR] and arithmetic calculation [AR]) after first and second grades, and performance on complex tasks (reading comprehension [RC] and problem solving [PS]) after second and third grades.

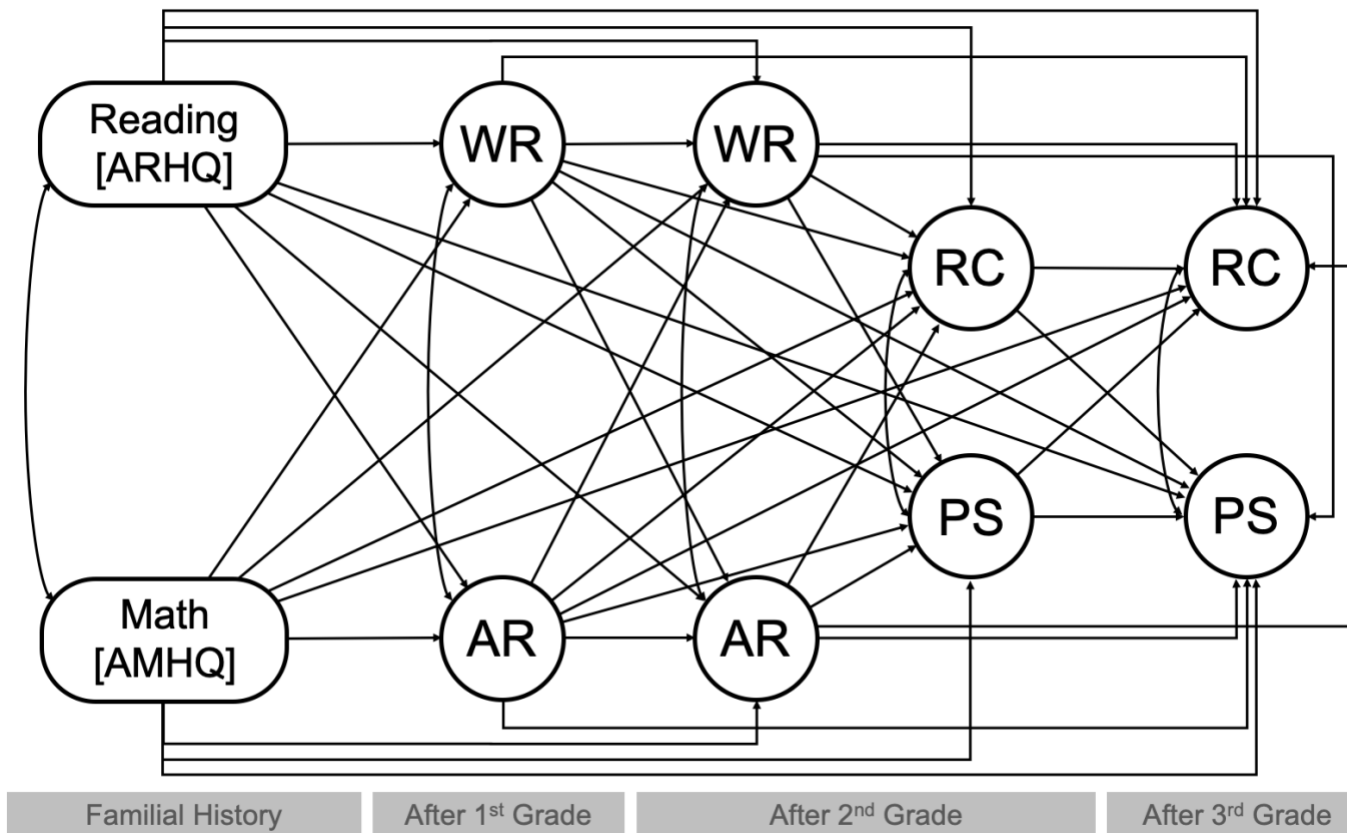

### **3. Supplementary Materials and Methods**

To address the gap in the literature such that there is currently no validated scale that captures familial history of math difficulties that mirror the *Adult Reading History Questionnaire* (ARHQ; Lefly & Pennington, 2000) (or shown to be correlated with current parental academic functioning), the *Adult Math History Questionnaire* (AMHQ) was designed and implemented when the current longitudinal study began in 2015 in order to track the role of familial math history in children's academic outcomes over time. Specifically, *Items 1, 2, 3, and 4* survey the respondents' experiences with math learning and related contents in elementary school, whereas *Items 5 and 6* with materials in upper education (high school and college). *Items 7, 8, and 10* target the respondents' (current) attitude toward math and related contents, while *Items 14, 15, 16, and 17* also place an emphasis on confidence and interest in math. *Items 9, 11, 12, and 13* inquire about the respondents' current numeracy practices and math exposure.



## 4. Supplementary Results

### 4.1. Psychometric Findings

Item-level loading coefficients for individual factors derived from the ARHQ and AMHQ can be found in **Tables 3** and **4**.

- Adult Reading History Questionnaire (ARHQ):
  - [Factor 1] Childhood Ability includes [Item 3] “How much extra help did you need when learning to read in elementary school?” (loading coef. = 0.832), [Item 2] “How much difficulty did you have learning to read in elementary school?” (loading coef. = 0.822), [Item 15] “Did your parents ever consider having you repeat any grades in school due to academic failure (not illness)?” (loading coef. = 0.718), [Item 6] “How would you compare your reading skill to that of others in your elementary classes?” (loading coef. = 0.697), and [Item 7] “All students struggle from time to time in school. In comparison to others in your classes, how much did you struggle to complete your work?” (loading coef. = 0.638). Overall, these items focused on how parents functioned in school and elementary education, thus reflecting Childhood Ability in reading.
  - [Factor 2] Attitude/Exposure includes [Item 10] “How much reading do you do for pleasure? (loading coef. = 0.952) and [Item 20] “How many books do you read for pleasure each year?” (loading coef. = 0.849). These items highlighted parents’ current reading and literacy practices, thus indicating Attitude/Exposure in reading.
  - [Factor 3] Memory includes [Item 16] “Do you ever have difficulty remembering people’s names or names of places?” (loading coef. = 0.901), [Item 17] “Do you every have difficulty remembering addresses, phone numbers, or dates?” (loading coef. = 0.717), and [Item 18] “Do you have difficulty remembering complex verbal instructions?” (loading coef. = 0.649). These items queried parents’ memory abilities across different contexts (in terms of, e.g., names, numbers, dates, and instructions), thus illustrating Memory.
  - [Factor 4] Media Use includes [Item 23] “Do you read a newspaper on Sunday?” (loading coef. = 0.918) and [Item 22] “Do you read daily (Monday-Friday) newspapers?” (loading coef. = 0.725). These items inquired about parents’ current usage of print and media, particularly newspapers, thus revealing Media Use.
  - [Factor 5] Reversal includes [Item 4] “Did you ever reverse the order of letters or numbers when you were a child?” (loading coef. = 0.995). This item asked about parents’ previous experience with switching the order of letters or numbers as a child, thus representing Reversal.
  - [Factor 6] Spelling includes [Item 14] “How would you compare your current spelling to that of others of the same age and education?” (loading coef. = 0.913). This item questioned about parents’ current spelling ability relative to their peers (of same age and education), thus implicating Spelling.
- Adult Math History Questionnaire (AMHQ):
  - [Factor 1] Attitude/Exposure includes [Item 7] “What is your current attitude towards math?” (loading coef. = 0.896), [Item 8] “Math makes me feel uncomfortable and nervous.” (loading coef. = 0.814), [Item 14] “How would you compare your current math skills to those of others of the same age and education?” (loading coef. = 0.755), [Item 12] “I enjoy completing math and logic puzzles for fun.” (loading coef. = 0.736), [Item 17] “New math content has usually been easy and enjoyable for me to understand.”

(loading coef. = 0.709), and [Item 16] “I feel confident in helping my child with their math and homework (loading coef. = 0.667). Items 7, 8, 12, 14, and 17 though with different phrasing (i.e., in forms of a question or statement) showed high correlations ( $r$ 's = 0.508 – 0.766,  $p < 0.05$ ; mean  $r = 0.626$ ) and, as such, loaded highly (coefficients  $> 0.700$ ) into one construct characterizing parents' current attitude towards math and numeracy practices – or Attitude/Exposure in math.

- [Factor 2] Childhood Ability includes [Item 2] “When in elementary school, I needed extra help in math from a teacher or tutor.” (loading coef. = 0.965), [Item 1] “When in elementary school, I struggled with learning new concepts in math.” (loading coef. = 0.914), [Item 4] “Compared to others in your elementary classes, how much did you struggle to complete your math work?” (loading coef. = 0.803), and [Item 3] “How would you compare your math skills to those of others in your elementary classes?” (loading coef. = 0.678). Items 1, 2, and 4 though with different phrasing showed high correlations ( $r$ 's = 0.780 – 0.857,  $p < 0.05$ ; mean  $r = 0.819$ ) and, as such, loaded highly (coefficients  $> 0.700$ ) into one construct describing parents' self-reported experiences with learning math and related contents in elementary school – or Childhood Ability in math.

Pairwise correlations between factor scores on the ARHQ and AMHQ and performance-based measures of parents' academic skills can be found in **Supplementary Table 7**.

- Adult Reading History Questionnaire (ARHQ):
  - The Childhood Ability factor was found to be significantly and positively correlated with the Attitude/Exposure, Memory, Reversal, and Spelling factors ( $r = 0.26 – 0.64$ , all  $p < 0.05$ ), but not with the Media Use factor ( $p > 0.05$ ). The Attitude/Exposure factor was significantly and positively correlated with the Memory, Media Use, and Spelling factors ( $r = 0.19 – 0.28$ , all  $p < 0.05$ ), but not with the Reversal factor ( $p > 0.05$ ). The Memory factor was significantly and positively correlated with the Media Use, Reversal, and Spelling factors ( $r = 0.22 – 0.30$ , all  $p < 0.05$ ). The Media Use factor was not correlated with either the Reversal or Spelling factors ( $p < 0.05$ ). The Reversal factor was significantly and positively correlated with the Spelling factor ( $r = 0.34$ ,  $p < 0.05$ ).
  - The Childhood Ability factor was found to be significantly and negatively correlated with reading scores ( $r = -0.34 – -0.47$ ), as well as with math scores ( $r = -0.30 – -0.34$ ) (all  $p < 0.05$ ). The Attitude/Exposure factor was significantly and negatively correlated with reading scores ( $r = -0.21 – -0.24$ , all  $p < 0.05$ ; with the exception of the Word Attack subtest,  $r = -0.15$ ,  $p > 0.05$ ) but not with any of the math scores ( $p > 0.05$ ). The Memory factor was not correlated with any of the reading or math scores ( $p > 0.05$ ). The Media Use factor was not correlated with any of the reading or math scores ( $p > 0.05$ ). The Reversal factor was significantly and negatively correlated with scores on the Word Attack and Sentence Reading Fluency subtests for reading ( $r = -0.16$  and  $-0.18$ , respectively), as well as with math scores ( $r = -0.20 – -0.22$ ) (all  $p < 0.05$ ). The Spelling factor was significantly and negatively correlated with reading scores ( $r = -0.37 – -0.48$ ), as well as with math scores ( $r = -0.23 – -0.31$ ) (all  $p < 0.05$ ).
- Adult Math History Questionnaire (AMHQ):
  - The Childhood Ability factor was found to be significantly and positively correlated with the Attitude/Exposure factor ( $r = 0.68$ ,  $p < 0.05$ ).

- The Childhood Ability factor in the ARHQ was found to be significantly and positively correlated with the Childhood Ability and Attitude/Exposure factors in the AMHQ ( $r = 0.48$  and  $0.27$ , respectively, both  $p < 0.05$ ). The Attitude/Exposure factor in the ARHQ was not correlated with any of the factors in the AMHQ ( $p > 0.05$ ). The Memory factor in the ARHQ was significantly and positively correlated with the Childhood Ability and Attitude/Exposure factors in the AMHQ ( $r = 0.24$  and  $0.18$ , both  $p < 0.05$ ). The Media Use factor in the ARHQ was not correlated with any of the factors in the AMHQ ( $p > 0.05$ ). The Reversal factor in the ARHQ was significantly and positively correlated with the Childhood Ability factor in the AMHQ ( $r = 0.19$ ,  $p < 0.05$ ). The Spelling factor in the ARHQ was significantly and positively correlated with the Childhood Ability and Attitude/Exposure factors in the AMHQ ( $r = 0.34$  and  $0.17$ , both  $p < 0.05$ ).
- The Childhood Ability factor was found to be significantly and negatively correlated with math scores ( $r = -0.43$  –  $-0.53$ , all  $p < 0.05$ ), as well as with reading scores ( $r = -0.21$  –  $-0.23$ , all  $p < 0.05$ ; with exception of the Sentence Reading Fluency subtest,  $r = -0.09$ ,  $p > 0.05$ ). The Attitude/Exposure factor was significantly and negatively correlated with math scores ( $r = -0.38$  –  $-0.49$ , all  $p < 0.05$ ), but not with any of the reading scores ( $p > 0.05$ ).

## 4.2. Correlational Findings

Pairwise correlations between scores on individual factors derived from the ARHQ and AMHQ and measures of children's academic performance can be found in **Supplementary Table 8**. Note that the directionality for the computed factor scores remain consistent with the directionality of the questions on each scale – that is, higher scores on any factors extracted from the ARHQ or AMHQ indicate, e.g., increased difficulties with learning to read or do simple arithmetic (see **Materials and Methods**).

- Adult Reading History Questionnaire (ARHQ):
  - The Childhood Ability factor was found to be significantly and negatively correlated with children's WR skills measured after first ( $r = -0.24$ ) and second grades ( $r = -0.20$ ), as well as with AR abilities captured after first ( $r = -0.15$ ) and second grades ( $r = -0.15$ ) (all  $p < 0.05$ ). The Childhood Ability factor was also significantly and negatively correlated with children's performance on RC task administered after second grade ( $r = -0.16$ ), as well as on PS assessment collected after second grade ( $r = -0.26$ ) (both  $p < 0.05$ ).
  - The Attitude/Exposure factor was significantly and negatively correlated with children's performance on RC tasks administered after second ( $r = -0.16$ ) and third grades ( $r = -0.24$ ), as well as on PS assessments collected after second ( $r = -0.27$ ) and third grades ( $r = -0.25$ ) (all  $p < 0.05$ ).
  - The Media Use factor was significantly and negatively correlated with children's AR ability measured after second grade ( $r = -0.19$ ), as well as performance on RC task ( $r = -0.22$ ) and PS assessment ( $r = -0.19$ ) collected after second grade (all  $p < 0.05$ ).
  - The Spelling factor was significantly and negatively correlated with children's WR skill measured after first grade ( $r = -0.16$ ,  $p < 0.05$ ).
- Adult Math History Questionnaire (AMHQ):
  - The Childhood Ability factor was found to be significantly and negatively correlated with children's WR skill measured after first grade ( $r = -0.20$ ), as well as AR abilities captured after first ( $r = -0.23$ ) and second grades ( $r = -0.31$ ) (all  $p < 0.05$ ). The Childhood Ability

factor was also significantly and negatively correlated with children's performance on PS assessment collected after second grade ( $r = -0.21, p < 0.05$ ).

- The Attitude/Exposure factor was significantly and negatively correlated with children's AR ability captured after second grade ( $r = -0.27, p < 0.05$ ).

### 4.3. Path Findings

The initial model was reported with  $\chi^2 = 48.923$  ( $p = 0.002$ ),  $CFI = 0.980$ ,  $TLI = 0.832$ ,  $RMSEA = 0.087$  ( $p = 0.044$ ), and  $SRMR = 0.058$ , indicating a fair fit. To improve model fit, non-significant paths were constrained to zero. The final model was reported with  $\chi^2 = 173.946$  ( $p = 0.051$ ),  $CFI = 0.977$ ,  $TLI = 0.968$ ,  $RMSEA = 0.038$  ( $p = 0.825$ ), and  $SRMR = 0.041$ , indicating a good fit. This step in constraining non-significant paths to zero did not significantly improve the fit ( $\Delta\chi^2 = 125.02, p = 0.383$ ) when comparing the initial (full) and final models, though the latter was more parsimonious and thus subjected to further steps to evaluate the direct and indirect effects of individual factors derived from the ARHQ and AMHQ (see **Figure 2**). Summary findings from follow-up analyses to distinguish the effects of individual factors derived from the ARHQ and AMHQ on measures of children's academic performance in **Table 7** and are discussed below. Note that the directionality for the computed factor scores remain consistent with the directionality of the questions on each scale – that is, higher scores on any factors extracted from the ARHQ or AMHQ indicate, e.g., increased difficulties with learning to read or do simple arithmetic (see **Materials and Methods**).

#### 4.3.1. Direct and Indirect Effects on Core Academic Skills

- Familial history of reading difficulties (indexed by sub-scores on the ARHQ):
  - The Childhood Ability factor was shown to have a direct and negative effect on children's WR skill captured after first grade ( $b = -0.177$ ), which in turn had an indirect effect on WR outcome assessed after second grade ( $b = -0.158$ ) ( $p < 0.05$ ). The Childhood Ability factor also appeared to have an indirect on children's AR outcome evaluated after second grade via WR skill measured after first grade ( $b = -0.026, p < 0.05$ ).
- Familial history of math difficulties (indexed by sub-scores on the AMHQ):
  - The Childhood Ability factor was revealed to have a direct and negative effect on children's AR ability captured after first grade ( $b = -0.171$ ), which in turn had an indirect effect on AR outcome assessed after second grade ( $b = -0.112$ ) ( $p < 0.05$ ).
  - The Attitude/Exposure factor was demonstrated to have a direct and negative effect on children's AR outcome evaluated after second grade ( $b = -0.214, p < 0.05$ ).

#### 4.3.2. Direct and Indirect Effects on Performance on Complex Academic Tasks

- Familial history of reading difficulties:
  - The Childhood Ability factor was shown to have an indirect effect on children's performance on RC task evaluated after second grade via the serial effect of WR skills measured after first and second grades ( $b = -0.089, p < 0.05$ ). Such indirect effect of the Childhood Ability factor on RC performance captured after second grade in turn had an

impact on children's RC outcome assessed after third grade ( $b = -0.053, p < 0.05$ ). The Childhood Ability factor also appeared to have an indirect on children's performance on PS task measured after second grade via the serial effects of WR skill captured after first grade on AR ability after second grade ( $b = -0.010, p < 0.05$ ). Such indirect effect of familial history on PS performance assessed after second grade thereby had an impact on children's PS outcome evaluated after third grade ( $b = -0.002, p < 0.05$ ).

- The Media Use factor was revealed to have a direct and negative effect on children's performance on RC task measured after second grade ( $b = -0.131$ ), in turn had indirect effects on their RC outcome determined after third grade ( $b = -0.078$ ) ( $p < 0.05$ ). The Media Use factor also appeared to have an indirect effect on children's performance on PS assessment after third grade via RC outcome captured after third grade ( $b = -0.010, p < 0.05$ ).
- The Attitude/Exposure factor was demonstrated to have direct effects on children's RC outcome evaluated after third grade ( $b = -0.107$ ), as well as on their performance on PS task assessed after second grade ( $b = -0.109$ ) ( $p < 0.05$ ). Such direct effect from the Attitude and Exposure factor on children's PS performance after second grade in turn had an impact on their PS outcome measured after third grade ( $b = -0.027, p < 0.05$ ).
- Familial history of math difficulties:
  - The Childhood Ability factor was reported to have an indirect effect on children's performance on PS task evaluated after second grade via the serial effects of AR skills measured after first and second grades ( $b = -0.043, p < 0.05$ ). Such indirect effect of the Childhood Ability factor on PS performance captured after second grade in turn had an impact on children's PS outcome assessed after third grade ( $b = -0.011, p < 0.05$ ).
  - The Attitude/Exposure factor was shown to have an indirect effect on children's PS outcomes evaluated after second via their AR skill assessed after second grade ( $b = -0.081; p < 0.05$ ). The Attitude/Exposure factor appeared to also have an indirect on children's PS outcome captured after third grade via the concurrent relation between the measures of their AR and PS abilities evaluated after second grade ( $b = -0.020, p < 0.05$ ).
